# Supplementary material
Source: PubMed Central journal article supplement (PMC5572693)
Supplement: supp_fj.201601323RR_Supplemental_Figure1.pdf [file supp_fj.201601323RR_Supplemental_Figure1.pdf]

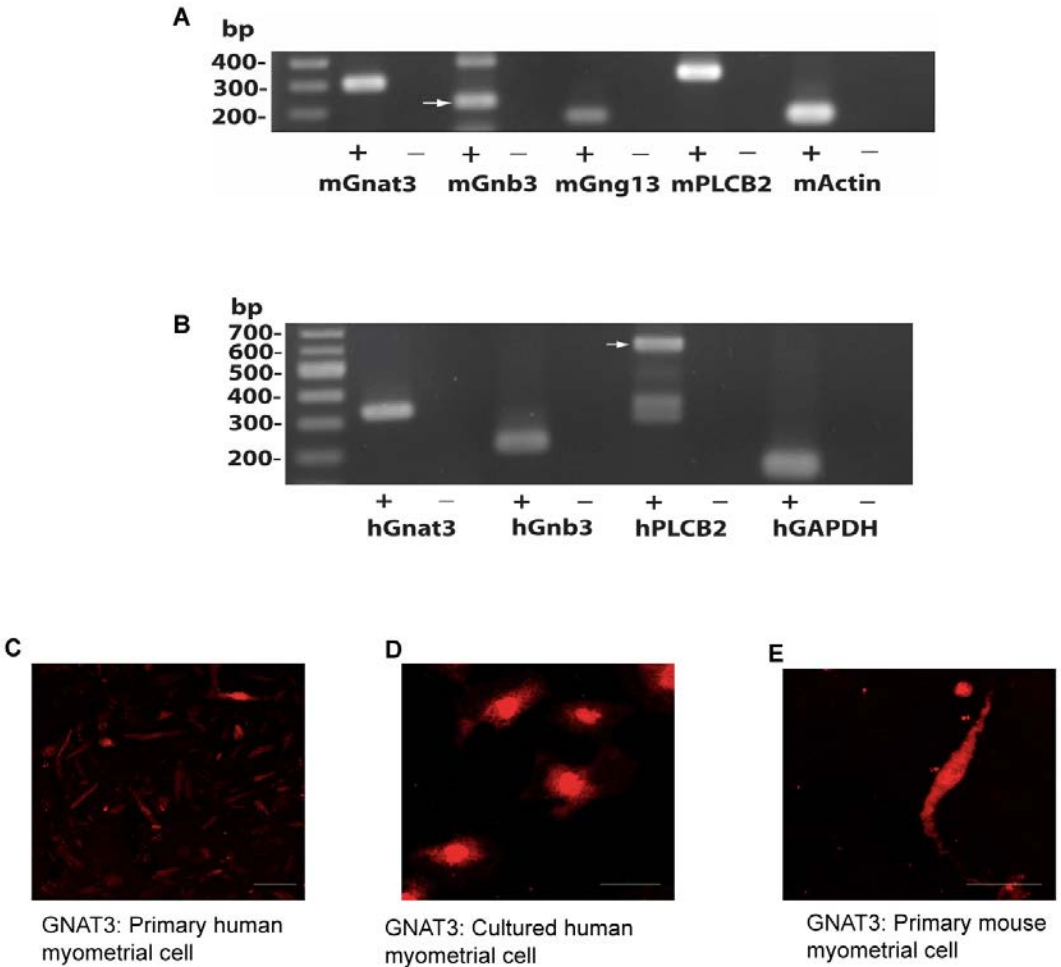

**Supplementary Fig. 1.** TAS2Rs signaling components are expressed in myometrium from mouse and human (A, B) RT-PCR detects mRNA for TAS2R signaling from an 18 days pregnant mouse. The mRNA transcripts were analyzed via RT-PCR for each gene with specific primers as listed in Tables 1 and 2. White arrows mark the molecular weight for expected products for mouse  $Gn\beta 3$  and human PLC $\beta 2$ . Mouse  $\beta$ -actin and human GAPDH, two housekeeping genes, were used as positive controls. (C, D, E) Immunochemical detection of  $\alpha$ -gustducin (i.e., Gnat3) in human primary myometrial cells from a late pregnant woman (C), in hTERT-HM cells (D) and in primary myometrial cells from day 18 pregnant mice (E). Four repeats in C,D. and E. A control with secondary antibodies alone did not show detectable signals, using the same experimental protocol, in any of the three cell types (data not shown). White bar: 50  $\mu$ m.
