# Supplementary material
Source: PubMed Central journal article supplement (PMC5572693)
Supplement: supp_fj.201601323RR_Supplemental_Figure2.pdf [file supp_fj.201601323RR_Supplemental_Figure2.pdf]

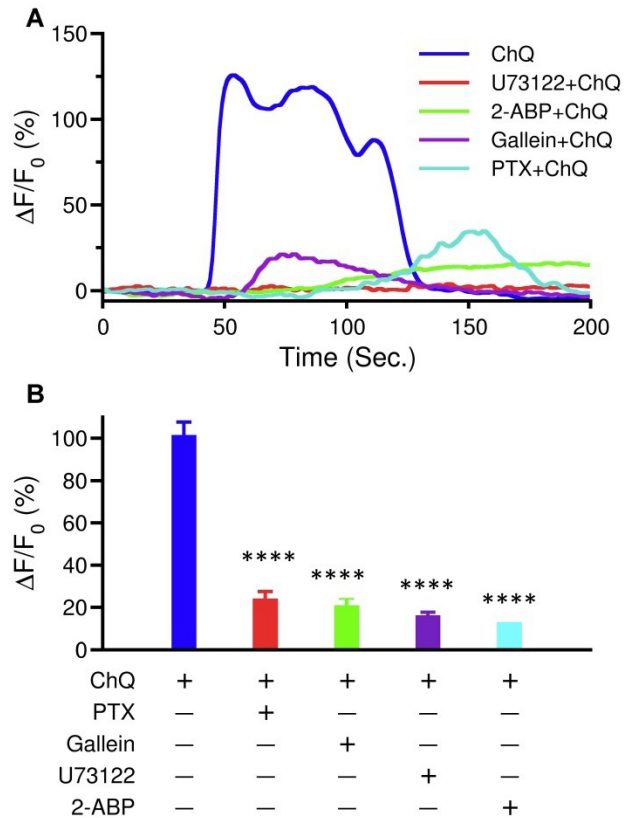

**Supplementary Fig. 2** Chloroquine activates TAS2R signaling to raise  $[Ca^{2+}]_i$  in cultured human myometrial cells (hTERT-HM). **(A)** Representative traces showing  $[Ca^{2+}]_i$  caused by 10 mM ChQ (no pre-treatment), and when pre-treated with inhibitors of the TAS2R signaling pathway the same way as in **Fig. 5**. **(B)** Summarized results of the experiments in A. Peak  $\Delta F/F_0$  in **A** was extracted from each curve and then used for comparison purposes. . Data are mean  $\pm$  s.e.m; n=5 repeats for all groups; t-test comparison with ChQ alone: \*\*\*\* P<0.0001.
