# Supplementary material
Source: PubMed Central journal article supplement (PMC5572693)
Supplement: supp_fj.201601323RR_Supplemental_Figure3.pdf [file supp_fj.201601323RR_Supplemental_Figure3.pdf]

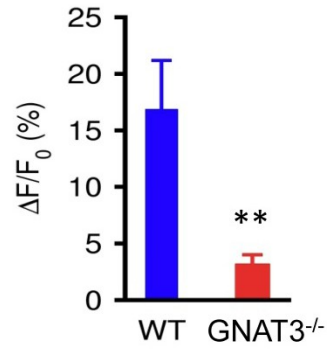

**Supplementary Fig. 3** The chloroquine (1 mM) induced transient rise in  $[Ca^{2+}]_i$  (as revealed in **Fig. 6B**) in the presence of 600 nM OT is mediated by GNAT3. Data are mean  $\pm$  s.e.m., n= 11cells for each group, \*\*P<0.01 WT vs GNAT3<sup>-/-</sup> mice; unpaired Student's t-test.
