# Supplementary material
Source: PubMed Central journal article supplement (PMC5572693)
Supplement: supp_fj.201601323RR_Supplemental_Figure4.pdf [file supp_fj.201601323RR_Supplemental_Figure4.pdf]

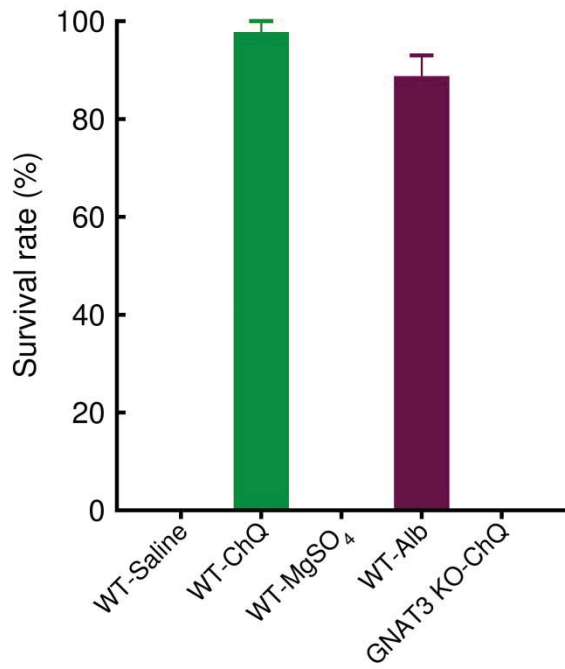

**Supplementary Fig. 4.** The survival rate of pups in the rescued preterm births by ChQ (2mg/dam) and Albuterol (100ng/dam) after LPS (1 $\mu$ g/dam) injection, n= 3-5. Note that all pups were found dead in RU486 (150  $\mu$ g/dam) treatment groups because RU486 appears to directly kill the pups.
